# Supplementary material for: Analysis of the direct economic impact of smoking-related hospitalizations in Italy
Source: PubMed Central journal article supplement (PMC11145629; doi:10.18332/tid/188111), 2024-06-03
Supplement: TID-22-96-s1.pdf [file TID-22-96-s1.pdf]

**Supplementary Table 1 – Prevalence of current, former, and never smokers in the Italian population, by sex and age groups (ISTAT, 2003) [1]**

| <b>Age group in 2003</b> | <b>Age group in 2018</b> | <b>% of current smokers</b> | <b>% of former smokers</b> | <b>% of never smokers</b> |
|--------------------------|--------------------------|-----------------------------|----------------------------|---------------------------|
| <b>Males</b>             |                          |                             |                            |                           |
| 15-19                    | 30-34                    | 14.7                        | 4.2                        | 81.1                      |
| 20-24                    | 35-39                    | 38.1                        | 9.3                        | 52.6                      |
| 25-34                    | 40-49                    | 40.2                        | 13.7                       | 46.0                      |
| 35-44                    | 50-59                    | 37.9                        | 23.1                       | 39.0                      |
| 45-54                    | 60-69                    | 37.1                        | 34.0                       | 28.9                      |
| 55-64                    | 70-79                    | 30.1                        | 40.8                       | 29.1                      |
| 65+                      | 80+                      | 18.0                        | 54.1                       | 27.9                      |
| <b>Females</b>           |                          |                             |                            |                           |
| 15-19                    | 30-34                    | 11.9                        | 4.6                        | 83.5                      |
| 20-24                    | 35-39                    | 21.8                        | 7.9                        | 70.3                      |
| 25-34                    | 40-49                    | 22.5                        | 13.5                       | 64.0                      |
| 35-44                    | 50-59                    | 25.5                        | 18.3                       | 56.2                      |
| 45-54                    | 60-69                    | 24.8                        | 19.1                       | 56.0                      |
| 55-64                    | 70-79                    | 17.1                        | 17.0                       | 65.9                      |
| 65+                      | 80+                      | 4.9                         | 12.5                       | 82.6                      |

**Supplementary Table 2 – Relative risks (RR) and 95% confidence intervals (CI) for current and former smokers compared to never smokers for each tobacco-related disease**

| Disease (ICD-9-CM codes) [source meta-analysis]         | RR (95% CI)                |                            |
|---------------------------------------------------------|----------------------------|----------------------------|
|                                                         | Former smokers             | Current smokers            |
| <b>Oropharyngeal cancer (141, 143-146, 148-149) [2]</b> | 1.40 (0.99-2.00)           | 3.43 (2.37-4.94)           |
| <b>Esophageal cancer (150) [2]</b>                      | 2.03 (1.77-2.33)           | 2.50 (2.00-3.13)           |
| <b>Gastric cancer (151) [3]</b>                         | 1.30 (1.23-1.37)           | 1.53 (1.44-1.62)           |
| <b>Pancreatic cancer (157) [4]</b>                      | 1.20 (1.10-1.20)           | 1.80 (1.70-1.90)           |
| <b>Laryngeal cancer (161) [2]</b>                       | 4.65 (3.35-6.45)           | 6.98 (3.14-15.5)           |
| <b>Lung cancer (162) [2]</b>                            | 3.85 (2.77-5.34)           | 8.96 (6.73-12.10)          |
| <b>Bladder cancer (188) [2]</b>                         | 1.72 (1.46-2.04)           | 2.77 (2.17-3.54)           |
| <b>IHD (410-414) [5]</b>                                | Age < 65: 1.45 (1.41-1.50) | Age < 65: 3.06 (3.00-3.13) |
|                                                         | Age ≥ 65: 1.12 (1.07-1.16) | Age ≥ 65: 1.66 (1.59-1.74) |
| <b>Stroke (430-438) [5]</b>                             | Age < 65: 1.30 (1.12-1.50) | Age < 65: 3.12 (2.80-3.47) |
|                                                         | Age ≥ 65: 1.15 (1.07-1.24) | Age ≥ 65: 1.65 (1.52-1.79) |
| <b>Arteriosclerosis (440-448) [5]</b>                   | 1.82 (1.70-1.95)           | 2.54 (2.42-2.67)           |
| <b>Pneumonia and influenza (480-487) [5]</b>            | 1.29 (1.15-1.45)           | 1.47 (1.33-1.61)           |
| <b>COPD (490-492, 496) [5]</b>                          | 6.70 (6.20-7.20)           | 9.80 (9.20-10.20)          |

COPD: chronic obstructive pulmonary disease, IHD: ischaemic heart disease.

**Supplementary Table 3** – Sensitivity analysis of hospitalisations and expenditures attributable to smoking, stratified by disease, using relative risks from Carter et al. [6] (Italy, 2018)

| Disease                 | PAF hospitalisations | Attributable hospitalisations | PAF expenditure | Attributable expenditure |
|-------------------------|----------------------|-------------------------------|-----------------|--------------------------|
| Oropharyngeal cancer    | 59.62%               | 5,808                         | 59.76%          | € 27,674,642             |
| Esophageal cancer       | 56.38%               | 2,540                         | 56.67%          | € 12,855,218             |
| Gastric cancer          | 23.66%               | 4,701                         | 23.59%          | € 28,054,514             |
| Pancreatic cancer       | 15.66%               | 3,837                         | 15.80%          | € 19,436,858             |
| Laryngeal cancer        | 83.75%               | 6,494                         | 83.63%          | € 35,266,729             |
| Lung cancer             | 87.72%               | 59,898                        | 87.80%          | € 272,572,151            |
| Bladder cancer          | 54.90%               | 42,797                        | 54.95%          | € 138,985,439            |
| IHD                     | 37.12%               | 97,712                        | 37.71%          | € 582,489,872            |
| Stroke                  | 19.63%               | 49,258                        | 20.38%          | € 274,671,833            |
| Arteriosclerosis        | 44.77%               | 38,565                        | 46.57%          | € 260,908,848            |
| Pneumonia and influenza | 23.37%               | 31,738                        | 23.37%          | € 114,167,591            |
| COPD                    | 85.24%               | 30,246                        | 85.89%          | € 75,275,728             |
| <b>Total</b>            | <b>37.96%</b>        | <b>373,621</b>                | <b>37.31 %</b>  | <b>€ 1,842,359,424</b>   |

Attributable expenditure: expenditure (€) attributable to tobacco smoking, Attributable hospitalisations: number of hospitalisations attributable to tobacco smoking, COPD: chronic obstructive pulmonary disease, IHD: ischaemic heart disease, PAF: Population Attributable Fraction

**Supplementary Figure 1 - Hospitalisation rates of 12 tobacco-related diseases, per million inhabitants (Italy, 2018)**

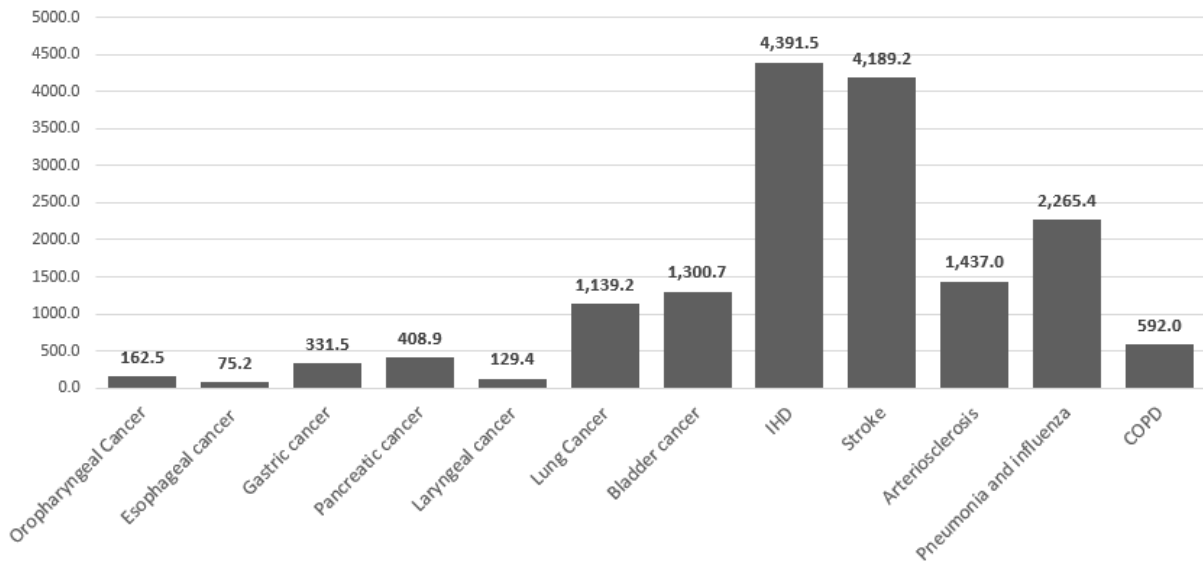

COPD: chronic obstructive pulmonary disease, IHD: ischaemic heart disease.

## References

1. ISTAT. I.Stat - your direct access to the Italian Statistics. Available at <http://dati.istat.it/?lang=en>. Accessed December 14, 2023.
2. Gandini S, Botteri E, Iodice S, Boniol M, Lowenfels AB, Maisonneuve P, et al. Tobacco smoking and cancer: a meta-analysis. *International journal of cancer*. 2008;122(1):155-164. doi: 10.1002/ijc.23033
3. Rota M, Possenti I, Valsassina V, Santucci C, Bagnardi V, Corrao G, et al. Dose-response association between cigarette smoking and gastric cancer risk: a systematic review and meta-analysis. *Gastric Cancer*. 2024. doi: 10.1007/s10120-023-01459-1
4. Lugo A, Peveri G, Bosetti C, Bagnardi V, Crippa A, Orsini N, et al. Strong excess risk of pancreatic cancer for low frequency and duration of cigarette smoking: A comprehensive review and meta-analysis. *Eur J Cancer*. 2018;104:117-126. doi: 10.1016/j.ejca.2018.09.007
5. English D. R., Holman C. D. J., Milne E., Winter M. G., Hulse G., Codde J. P., et al. The quantification of drug caused morbidity and mortality in Australia. *Australian Government Publishing Service*. 1995;2.
6. Carter BD, Abnet CC, Feskanich D, Freedman ND, Hartge P, Lewis CE, et al. Smoking and mortality--beyond established causes. *N Engl J Med*. 2015;372(7):631-640. doi: 10.1056/NEJMsa1407211

©2024 Possenti I. et al.
